# Supplementary material
Source: PubMed Central journal article supplement (PMC4725285)
Supplement: AEM.02440-15_zam999116893so1.pdf [file AEM.02440-15_zam999116893so1.pdf]

Table S1. PFGE and MLGT subtypes of isolates selected for whole genome sequencing

| Isolate | serotype | outbreak/sporadic/food           | date | AcsI        | ApaI        | MLGT type         | reference |
|---------|----------|----------------------------------|------|-------------|-------------|-------------------|-----------|
| F4233   | 1/2b     | Philadelphia outbreak            | 1987 | GX6A16.0009 | GX6A12.0015 | 1.18_1/2b_IL94    | (1)       |
|         |          | chocolate milk gastroenteritis   | 1994 |             |             |                   | (2)       |
| G6054   | 1/2b     | outbreak                         |      | GX6A16.0130 | GX6A12.0366 | 1.18_1/2b_IL94    |           |
| L1181   | 1/2b     | Sporadic                         | 2009 | GX6A16.0019 | GX6A12.0094 | 1.30_1/2b         | --        |
| L1254   | 1/2b     | sporadic                         | 2009 | GX6A16.0416 | GX6A12.1320 | 1.30_1/2b         | --        |
| L2624   | 1/2b     | cantaloupe outbreak              | 2011 | GX6A16.0019 | GX6A12.0227 | 1.30_1/2b         | (3)       |
| L2663   | 1/2b     | cantaloupe outbreak              | 2011 | GX6A16.1471 | GX6A12.2154 | 1.30_1/2b         | (3)       |
| G4599   | 1/2b     | Italian gastroenteritis outbreak | 1993 | GX6A16.0243 | GX6A12.0143 | 1.24_1/2b         | (4)       |
| J2692   | 1/2a     | sporadic                         | 2003 | GX6A16.0083 | GX6A12.0001 | 2.12_1/2a         | --        |
| L1846   | 1/2a     | hog head cheese outbreak         | 2010 | GX6A16.0001 | GX6A12.0001 | 2.12_1/2a         | (5)       |
| L2626   | 1/2a     | cantaloupe outbreak              | 2011 | GX6A16.0099 | GX6A12.0001 | 2.12_1/2a         | (3)       |
| L2676   | 1/2a     | cantaloupe outbreak              | 2011 | GX6A16.0001 | GX6A12.0001 | 2.12_1/2a         | (3)       |
| F4235   | 1/2a     | Philadelphia outbreak            | 1987 | GX6A16.0014 | GX6A12.0017 | 2.1_1/2a_US00_EC3 | (1)       |
| J0221   | 1/2a     | sporadic                         | 2000 | GX6A16.0170 | GX6A12.0316 | 2.46_1/2a         | --        |
| J0847   | 1/2a     | sporadic                         | 2001 | GX6A16.0233 | GX6A12.0467 | 2.46_1/2a         | --        |
| L1023   | 1/2a     | Mexican-style cheese outbreak    | 2009 | GX6A16.0527 | GX6A12.1603 | 2.93_1/2a         | (6)       |

|        |      |                         |      |             |             |           |     |
|--------|------|-------------------------|------|-------------|-------------|-----------|-----|
| 2012L- |      |                         | 2012 |             |             |           | (7) |
| 5240   | 1/2a | ricotta salata outbreak |      | GX6A16.0268 | GX6A12.2297 | 2.54_1/2a |     |
| 2012L- |      |                         | 2012 |             |             |           | (7) |
| 5323   | 1/2a | ricotta salata outbreak |      | GX6A16.0408 | GX6A12.0096 | 2.54_1/2a |     |
| L1118  | 1/2a | sprouts outbreak        | 2009 | GX6A16.0282 | GX6A12.0355 | 2.79_1/2a | (8) |
| L2074  | 1/2a | celery outbreak         | 2010 | GX6A16.0074 | GX6A12.0174 | 2.36_1/2a | (9) |
| L2625  | 1/2a | cantaloupe outbreak     | 2011 | GX6A16.0029 | GX6A12.0069 | 2.46_1/2a | (3) |

---

## References

1. **Schwartz B, Hexter D, Broome CV, Hightower AW, Hirschhorn RB, Porter JD, Hayes PS, Bibb WF, Lorber B, Faris DG.** 1989. Investigation of an outbreak of listeriosis: new hypotheses for the etiology of epidemic *Listeria monocytogenes* infections. *J Infect Dis* **159**:680-685.
2. **Dalton CB, Austin CC, Sobel J, Hayes PS, Bibb WF, Graves LM, Swaminathan B, Proctor ME, Griffin PM.** 1997. An outbreak of gastroenteritis and fever due to *Listeria monocytogenes* in milk. *N Engl J Med* **336**:100-105.
3. **McCollum JT, Cronquist AB, Silk BJ, Jackson KA, O'Connor KA, Cosgrove S, Gossack JP, Parachini SS, Jain NS, Ettetstad P, Ibraheem M, Cantu V, Joshi M, DuVernoy T, Fogg NW, Jr., Gorny JR, Mogen KM, Spires C, Teitell P, Joseph LA, Tarr CL, Imanishi M, Neil KP, Tauxe RV, Mahon BE.** 2013. Multistate outbreak of listeriosis associated with cantaloupe. *N Engl J Med* **369**:944-953.

4. **Franciosa G, Pourshaban M, Gianfranceschi M, Aureli P.** 1998. Genetic typing of human and food isolates of *Listeria monocytogenes* from episodes of listeriosis. *Eur J Epidemiol* **14**:205-210.
5. **CDC.** 2011. Outbreak of invasive listeriosis associated with the consumption of hog head cheese--Louisiana, 2010. *MMWR Morb Mortal Wkly Rep* **60**:401-405.
6. **Jackson KA, Biggerstaff M, Tobin-D'Angelo M, Sweat D, Klos R, Nosari J, Garrison O, Boothe E, Saathoff-Huber L, Hainstock L, Fagan RP.** 2011. Multistate outbreak of *Listeria monocytogenes* associated with Mexican-style cheese made from pasteurized milk among pregnant, Hispanic women. *J Food Prot* **74**:949-953.
7. **Heiman KE, Garalde VB, Gronostaj M, Jackson KA, Beam S, Joseph L, Saupe A, Ricotta E, Waechter H, Wellman A, Adams-Cameron M, Ray G, Fields A, Chen Y, Datta A, Burall L, Sabol A, Kucerova Z, Trees E, Metz M, Leblanc P, Lance S, Griffin PM, Tauxe RV, Silk BJ.** 2015. Multistate outbreak of listeriosis caused by imported cheese and evidence of cross-contamination of other cheeses, USA, 2012. *Epidemiol Infect* doi:10.1017/S095026881500117X:1-11.
8. **Cartwright EJ, Jackson KA, Johnson SD, Graves LM, Silk BJ, Mahon BE.** 2013. Listeriosis outbreaks and associated food vehicles, United States, 1998-2008. *Emerg Infect Dis* **19**:1-9; quiz 184.
9. **Gaul LK, Farag NH, Shim T, Kingsley MA, Silk BJ, Hyytia-Trees E.** 2012. Hospital-Acquired Listeriosis Outbreak Caused by Contaminated Diced Celery--Texas, 2010. *Clin Infect Dis* doi:10.1093/cid/cis817.
